- psychodiagnostic tests after anesthesia. *Can Anaesth Soc J* 14:567-583, 1967
4. Doenicke A, Kugler J, Schellenberger A, et al: The use of electroencephalography to measure recovery time after intravenous anesthesia. *Br J Anaesth* 38:550-590, 1966
  5. Baird ES, Hailey DM: Delayed recovery from a sedative: Correlation of the plasma levels of diazepam with clinical effects after oral and intravenous administration. *Br J Anaesth* 44:803-807, 1972
  6. Carson IW, Graham J, Dundee JW: Clinical studies of induction agents. XLIII: Recovery from Althesin—a comparative study with thiopentone and methohexitone. *Br J Anaesth* 47:358-364, 1975
  7. Doenicke A, Kugler J: Electrical brain function during emergence time after methohexital and propanidid anaesthesia. *Acta Anaesthesiol Scand suppl* 17:99-103, 1965
  8. Dundee JW: Ultrashort-acting barbiturates for outpatients. *Acta Anaesthesiol Scand suppl* 17:17-19, 1965
  9. Green R, Long HA, Elliott CJR, et al: A method of studying recovery after anesthesia. *Anaesthesia* 18:189-199, 1963
  10. Allen GD, Kennedy WF Jr, Tolas AG, et al: Comparative cardiovascular effects of general anesthesia for outpatient oral surgery. *J Oral Surg* 26:784-789, 1968
  11. Allen GD, Kennedy WF, Everett G, et al: A comparison of the cardiorespiratory effects of methohexital and thiopental supplementation for outpatient dental anesthesia. *Anesth Analg (Cleve)* 48:730-735, 1969
  12. Wise CC, Robinson JS, Heath MJ, et al: Physiological responses to intermittent methohexitone for conservative dentistry. *Br Med J* 2:540-543, 1969
  13. Ogg TS: An assessment of postoperative outpatient cases. *Br Med J* 4:573-576, 1972
  14. Bruce DL, Bach MJ, Arbit J: Trace anesthetic effects on perceptual, cognitive and motor skills. *ANESTHESIOLOGY* 40:453-458, 1974
  15. Bruce DL, Bach MJ: Psychological studies of human performance as affected by traces of enflurane and nitrous oxide. *ANESTHESIOLOGY* 42:194-196, 1975

## *The Blood Shortage:*

### *Is Autotransfusion an Answer?*

MORE THAN EIGHT MILLION units of blood are administered to patients annually in the United States, and this volume will undoubtedly continue to increase as our surgical colleagues attempt increasingly complex procedures, ranging from radical cancer or trauma surgery to transplant and open-heart procedures. In fact, it has been suggested that if the growth of coronary-artery surgery were to continue at the present rate and the amount of blood used per case to remain the same, the nation's entire blood resource would be required for that one procedure by 1976.<sup>1</sup> Increased donor recruitment through such ingenious means as giving tax credits<sup>2</sup> or the new national blood system<sup>3</sup> may alter the fact that 97 per cent of the eligible population are non-donors. Similarly, more efficient use of the available supply through selective component therapy,<sup>4</sup> use of blood substitutes, and acceptance of lower hematocrits will also help to conserve a precious national resource.

Autologous blood transfusion is an additional technique that has been proven to reduce the requirement for homologous blood. There are three variations to this technique<sup>5</sup>:

- 1) preoperative collection and storage;
- 2) acute perioperative collection and simultaneous hemodilution;
- 3) intraoperative blood scavenging.

#### **Preoperative Collection and Storage**

Autologous blood banking has lagged behind homologous mainly because of an inability to store whole blood more than 21 days. However, preoperative collection and storage can be expanded to provide as many as four units of blood less than ten days old.<sup>6</sup> Miles *et al.* now meet more than 90 per cent of their surgical blood needs with autologous blood. This group started conservatively in the mid-60's with single-unit phlebotomies ten days prior to operation and gradually expanded their work, until now they collect as much as three units at two-day intervals, the last being collected four days prior to operation.<sup>7</sup>

A variant of serial single-unit phlebotomies in which units are removed and reinfused at seven-day intervals in such a way that three units of blood less than ten days old are available at operation has been described

TABLE 1. "Piggyback" Technique of Preoperative Collection and Storage of Blood

|               | Day 1 | Day 7   | Day 14  | Day 16 | Day 23    |
|---------------|-------|---------|---------|--------|-----------|
| Collect unit  | A     | B and C | D and E | F      | Operation |
| Reinfuse unit |       | A       | B and C |        |           |

(table 1). Using this "piggyback" technique, Ascari *et al.* were able to provide 80 per cent of the blood needed by 16 patients undergoing pulmonary surgery.<sup>8</sup>

The single greatest deterrent to widespread acceptance of this practice has been the fear that patients would come to the operating room with a contracted blood volume. However, numerous studies have demonstrated that the plasma volume is restored within 12 hours after single-unit phlebotomy. This is made possible by rapid mobilization of extracellular fluid and protein.<sup>6,8</sup> A second deterrent has been the presumed inability of patients to replace erythrocytes adequately due to iron deficiency. Using intravenous iron dextran, stable hemoglobin levels have been maintained in healthy adult male subjects despite five single-unit phlebotomies per week for 22 weeks.<sup>19</sup> The same technique has been used to avoid iron deficiency while removing as much as four units at 48-hour intervals from 178 patients during the ten days prior to operation. All these patients came to surgery with hematocrits greater than 30 per cent.<sup>6</sup> Although there is no datum to substantiate the practice, a hematocrit of 30 per cent has been widely cited as a minimal acceptable preoperative level for surgical patients.<sup>6,10,11</sup>

A circumstance in which preoperative collection and storage has proven invaluable is when suitable donors cannot be found. Depending on the magnitude of surgery planned, stored blood may have to be frozen. In one case, a patient whose blood was compatible with those of fewer than one dozen persons throughout the world donated six units of blood at eight-week intervals prior to left total hip arthroplasty. During the procedure four of these units were reinfused.<sup>12</sup> Disadvantages of frozen storage include expense, restriction to use in large centers where freezing methods are available, and the necessity for infusion of the blood within 24 hours after thawing.<sup>13</sup> Advantages of this tech-

nique include the decreased risk of hepatitis, diminished quantity of ACD infused, and low incidence of pulmonary vascular reaction to donor leukocytes. Any blood collected that is not needed by the donor patient is then available for use in supplying the needs of other patients. In this way, preoperative collection and storage not only reduces demands on the blood bank—it also serves as a new source of homologous blood.

### Perioperative Collection and Hemodilution

In this technique, blood is collected in CPD-preservative bags from an arterial line while either crystalloid or colloid solutions are infused simultaneously via the venous line. If crystalloid solutions are used, two to four times the volume of blood collected will be required to maintain intravascular volume. In a controlled study of 50 patients undergoing cardiac surgery, Hallowell *et al.* found that the removal of 1,252 ml prior to cardiopulmonary bypass decreased the requirement for homologous blood and blood components by 25 per cent.<sup>14</sup> In a similar study of 300 patients, Ochsner *et al.* found the reduced requirement to average 50 per cent.<sup>15</sup> Their technique differed slightly in that they removed the blood via the aortic cannula just prior to cardiopulmonary bypass. In this way, they were able to monitor arterial blood pressure during the collection period.

### Intraoperative Blood Scavenging

This technique has been practiced in cardiac surgery for 20 years. While there have been early isolated reports of the use of autologous blood collected intraoperatively in varied circumstances, the application of equipment designed for cardiac surgery in other surgical procedures is a development of the past decade. In this issue, Stehling *et al.* review intraoperative autotransfusion and report

their experience. There has been no controlled study to demonstrate that use of this technique does reduce the requirements for homologous blood, as opposed to increasing bleeding by inadvertent systemic anticoagulation<sup>16</sup> or initiation of disseminated intravascular coagulation. Yet the value of this technique in cases where the immediate need for large volumes of blood cannot be met by the blood bank is obvious. Thus, large trauma centers have been among the first to use this technique. In fact, the first clinical trials were carried out in battle casualties in Vietnam. A logical extension is to use this equipment for any surgical procedure in which major blood loss is anticipated. Where blood loss of less than one liter is anticipated, the use of this equipment is probably not warranted. Preoperative collection and storage, or use of blood substitutes, should suffice to maintain intravascular volume provided the patient was not anemic at the start of the procedure.

### Summary

In addition to the obvious advantage of conservation of a vital national resource, the advantages of autotransfusion include: 1) decreased transmission of disease; 2) decreased incidence of isoimmunization; 3) ready availability of rare blood types; 4) elimination of technical errors in crossmatching. The three variations in the technique of autotransfusion are destined to become more widely used, and it is incumbent upon anesthesiologists to become familiar with the variations that are applicable to their patients.

NORIC ELLISON, M.D.

*Department of Anesthesia*

HAROLD A. WÜRZEL, M.D.

*Department of Pathology*

*University of Pennsylvania*

*Philadelphia, Pennsylvania 19104*

*American Association of Blood Banks*

*Subcommittee for Liaison with the*

*American Society of Anesthesiologists*

### References

1. Roche JK, Stengle JM: Open heart surgery and the demand for blood. *JAMA* 225:1516-21, 1973
2. Beyan W: On stimulating the gift of blood. *Science* 173:583, 1971
3. Surgenor D, Mac N: Progress toward a national blood system. *N Engl J Med* 291:17-22, 1974
4. Hummer GJ: Advances in blood component therapy. *ANESTHESIOLOGY* 34:309-311, 1971
5. Couch NP, Laks H, Pilon RN: Autotransfusion in three variations. *Arch Surg* 108:121-122, 1974
6. Newman MN, Hamstra R, Block M: Use of banked autologous blood in elective surgery. *JAMA* 218:861-863, 1971
7. Milles G, Langston H, Dalessandro W: *Autologous Transfusion*. Springfield, Ill., Charles C Thomas, 1971
8. Ascari WQ, Jolly PC, Thomas PA: Autologous blood transfusion in pulmonary surgery. *Transfusion* 8:111-115, 1968
9. Hamstra RD, Block MH: Erythropoiesis in response to blood loss in man. *J Appl Physiol* 27:503-507, 1969
10. Furman EB, Roman DG, Lemmer LAS, et al: Specific therapy in water, electrolyte and blood-volume replacement during pediatric surgery. *ANESTHESIOLOGY* 42:187-193, 1975
11. Kallos T, Smith TC: Replacement for intraoperative blood loss. *ANESTHESIOLOGY* 41:293-295, 1974
12. Allen C, Taswell HF, Polesky HF: Frozen storage of autologous blood. *Anesth Analg* (Cleve) 51:287-291, 1972
13. Brecia SM: Chapter 6, Autotransfusion, American Society of Anesthesiologists Workshop on Blood and Blood Products. Park Ridge, Ill., 1974, pp 102-123
14. Hallowell P, Bland JHL, Buckley MJ, et al: Transfusion of fresh autologous blood in open heart surgery. *J Thorac Cardiovasc Surg* 64:941-948, 1972
15. Ochsner JL, Mills NL, Leonard GL, et al: Fresh autologous blood transfusions with extracorporeal circulation. *Ann Surg* 177:811-817, 1973
16. Hampers CL, Blaufox MD, Merrill JP: Anticoagulation rebound after hemodialysis. *N Engl J Med* 275:776-778, 1966
